# Supplementary material for: First-principles analysis of seven novel phases of phosphorene with chirality
Source: Royal Society of Chemistry journal article supplement (doi:10.1039/c5ra25361f), 2016-01-01
Supplement: c5ra25361f5.pdf [file c5ra25361f5.pdf]

# First-principles Analysis of Seven Novel Phases of Phosphorene with Chirality

Jian-Rui Feng<sup>1</sup> and Gui-Chang Wang<sup>1,2,\*</sup>

<sup>1</sup> Department of Chemistry, Key Laboratory of Advanced Energy Materials Chemistry  
(Ministry of Education), Nankai University, Tianjin 300071, P. R. China;

<sup>2</sup> State Key Laboratory of Coal Conversion, Institute of Coal Chemistry, Chinese  
Academy of Sciences, Taiyuan, 030001, P. R. China)

\*Corresponding author: Gui-Chang Wang. E-mail: wangguichang@nankai.edu.cn

Telephone: +86-22-23503824 (O) Fax: +86-22-23502458

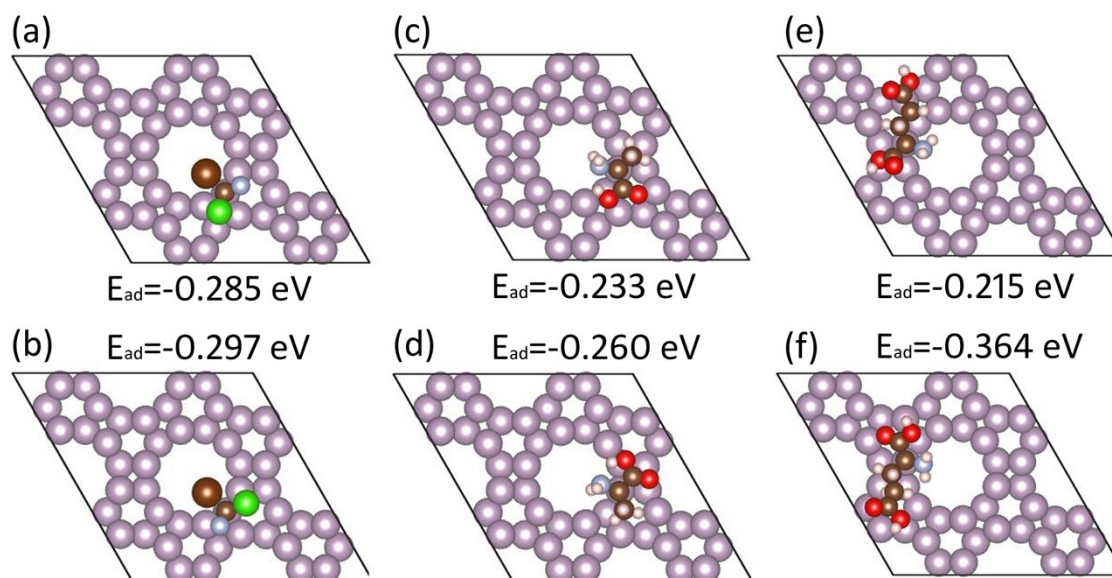

**Figure S1.** Adsorption structures of enantiomers of CHFClBr (a)(b), alanine (c)(d) and glutamic acid (e)(f). The adsorption energy was denoted and the differences of adsorption energy between enantiomers of CHFClBr, alanine and glutamic acid are 0.012, 0.028 and 0.149 eV, respectively.

**Structures of porous phosphorene, IGP-S, DHPP-S and DHPP-2-S (in POSCAR formation):**

porous phosphorene

```
1.0000000000000000
  9.8310003281000000    0.0000000000000000    0.0000000000000000
 -4.9155001640000000    8.5138960286999996    0.0000000000000000
  0.0000000000000000    0.0000000000000000    20.0000000000000000
H    P
  6    12
```

Direct

```
0.1555913162346911  0.3074276987611526  0.5132179273602020
0.3075167133905836  0.1539091960439620  0.4868100554797365
0.8480470250410050  0.1544956767659116  0.4870691811226777
0.1544420361109573  0.8471466079712400  0.5132262343232341
0.6948602663109682  0.8474201954605860  0.5130509237697396
0.8473552432369402  0.6942446394938386  0.4869757317633017
0.4459288994968418  0.2231937285515855  0.5278228172968937
0.5551169178629110  0.1090533735788455  0.4673795777853513
0.7783685891401078  0.2235967313054061  0.5278522011455991
0.1093298275083256  0.5544336386873070  0.5326379778567514
0.2239246533770256  0.4457123328404293  0.4721505547536609
0.4472504887365361  0.5552382145324586  0.5325259735309658
0.5550274567311533  0.4463128229706399  0.4672915561646818
0.7781967637686904  0.5555658595045827  0.5278255983933349
0.8926064776744411  0.4467507209960218  0.4673781286848850
0.2235765836331396  0.7778147398265247  0.4722240607192632
0.4470028811138178  0.8921373044290775  0.5325422093949541
0.5565078456318702  0.7783864762804384  0.4720293334547918
```

IGP-P-S

|                     |                    |                     |
|---------------------|--------------------|---------------------|
| 1.0000000000000000  |                    |                     |
| 8.9092840767069461  | 0.0000000000000000 | 0.0000000000000000  |
| -4.4546420383534731 | 7.7156663399942271 | 0.0000000000000000  |
| 0.0000000000000000  | 0.0000000000000000 | 20.9630213569575226 |

P

12

Direct

|                    |                    |                    |
|--------------------|--------------------|--------------------|
| 0.4559558325213615 | 0.3330815938542955 | 0.5297020695073726 |
| 0.4557740200770866 | 0.1228922807305324 | 0.4702759419226297 |
| 0.6693150359913602 | 0.1232930980062150 | 0.5299430529095375 |
| 0.1235638930724363 | 0.4551475368739162 | 0.5297377626375379 |
| 0.3333454022452997 | 0.4552518186057881 | 0.4700269993783195 |
| 0.5466199839989585 | 0.6682653185201275 | 0.5298707192538998 |
| 0.6689254397361424 | 0.5463034608201554 | 0.4698473675007904 |
| 0.8783764041152580 | 0.5459192332161535 | 0.5296174963526568 |
| 0.8787474698474469 | 0.3327249500007738 | 0.4700346846445598 |
| 0.1238729338284728 | 0.6688504456976005 | 0.4702914693204008 |
| 0.3332498400953483 | 0.8784156951873001 | 0.5301514107220910 |
| 0.5463537734708410 | 0.8782045984871445 | 0.4703809838501911 |

DHPP-S

1.0000000000000000

|                     |                    |                     |
|---------------------|--------------------|---------------------|
| 9.4454588212821644  | 0.0000000000000000 | 0.0000000000000000  |
| -4.7227294105915636 | 8.1800072896338776 | 0.0000000000000000  |
| 0.0000000000000000  | 0.0000000000000000 | 19.2155685892749410 |

P

12

Direct

|                    |                    |                    |
|--------------------|--------------------|--------------------|
| 0.5265568298622867 | 0.4176234855164012 | 0.5271520601980413 |
| 0.5184994000592624 | 0.2219526354798305 | 0.4577454074055396 |
| 0.6156158679285184 | 0.1291859990407787 | 0.5410384787713127 |
| 0.2098879581871671 | 0.5328323476715084 | 0.5428237598116041 |
| 0.4044422791349405 | 0.5395109134888898 | 0.4731674455472259 |
| 0.6072635927263477 | 0.7370229658100413 | 0.5345200721694781 |
| 0.7235688964952729 | 0.6196477781742971 | 0.4651548037604556 |
| 0.8909794816470367 | 0.5519839323497919 | 0.5257061912598076 |
| 0.7869592400432239 | 0.3125443422110692 | 0.4636876616787546 |
| 0.1164557515643594 | 0.6280286818860006 | 0.4589552193115765 |
| 0.2998922449707067 | 0.8009103327468239 | 0.5359124657858700 |
| 0.5392884543808663 | 0.9041863156245853 | 0.4739464433003278 |

DHPP-2-S

|                     |                    |                     |
|---------------------|--------------------|---------------------|
| 1.0000000000000000  |                    |                     |
| 10.4126714580131772 | 0.0000000000000000 | 0.0000000000000000  |
| -3.9047517967549417 | 6.7632285029254211 | 0.0000000000000000  |
| 0.0000000000000000  | 0.0000000000000000 | 20.5159056176365944 |

P

12

Direct

|                    |                    |                    |
|--------------------|--------------------|--------------------|
| 0.5483640113789150 | 0.1581244143538996 | 0.4661014271631174 |
| 0.7771307059931232 | 0.2503926015197422 | 0.5035626766325549 |
| 0.1258663674263545 | 0.4924085370087852 | 0.4392687326530549 |
| 0.1773997610172984 | 0.4401595531887281 | 0.5407819862469481 |
| 0.3782155462024051 | 0.4358612809978766 | 0.4985863338905290 |
| 0.4938105443531029 | 0.2938812295201032 | 0.5522686022214387 |
| 0.6623205410562321 | 0.5620939888289982 | 0.4984224817437450 |
| 0.8631480065965107 | 0.5580583841074613 | 0.5408197487586577 |
| 0.2633141823317189 | 0.7475700285947298 | 0.5032585757576769 |
| 0.4921903303852417 | 0.8400806742753204 | 0.4656579786840354 |
| 0.5470547413265407 | 0.7049890151342808 | 0.5519081752333364 |
| 0.9145352239325533 | 0.5050003634700531 | 0.4393632810149128 |
